# Supplementary material for: Comprehensive global genome dynamics of Chlamydia trachomatis show ancient diversification followed by contemporary mixing and recent lineage expansion
Source: PubMed Central journal article supplement (PMC5495073; doi:10.1101/gr.212647.116), 2017-07

genotype: A B-Ba C D E F G H I-Ia J K L1 L2 L2c L2b L3

chromosome

plasmid

420 SNPs

4 SNPs

Supplemental Fig S1 Comparison of genome (left) and plasmid (right) phylogenies with tips matched. The incongruence of the phylogenies indicates that inheritance is not always vertical.

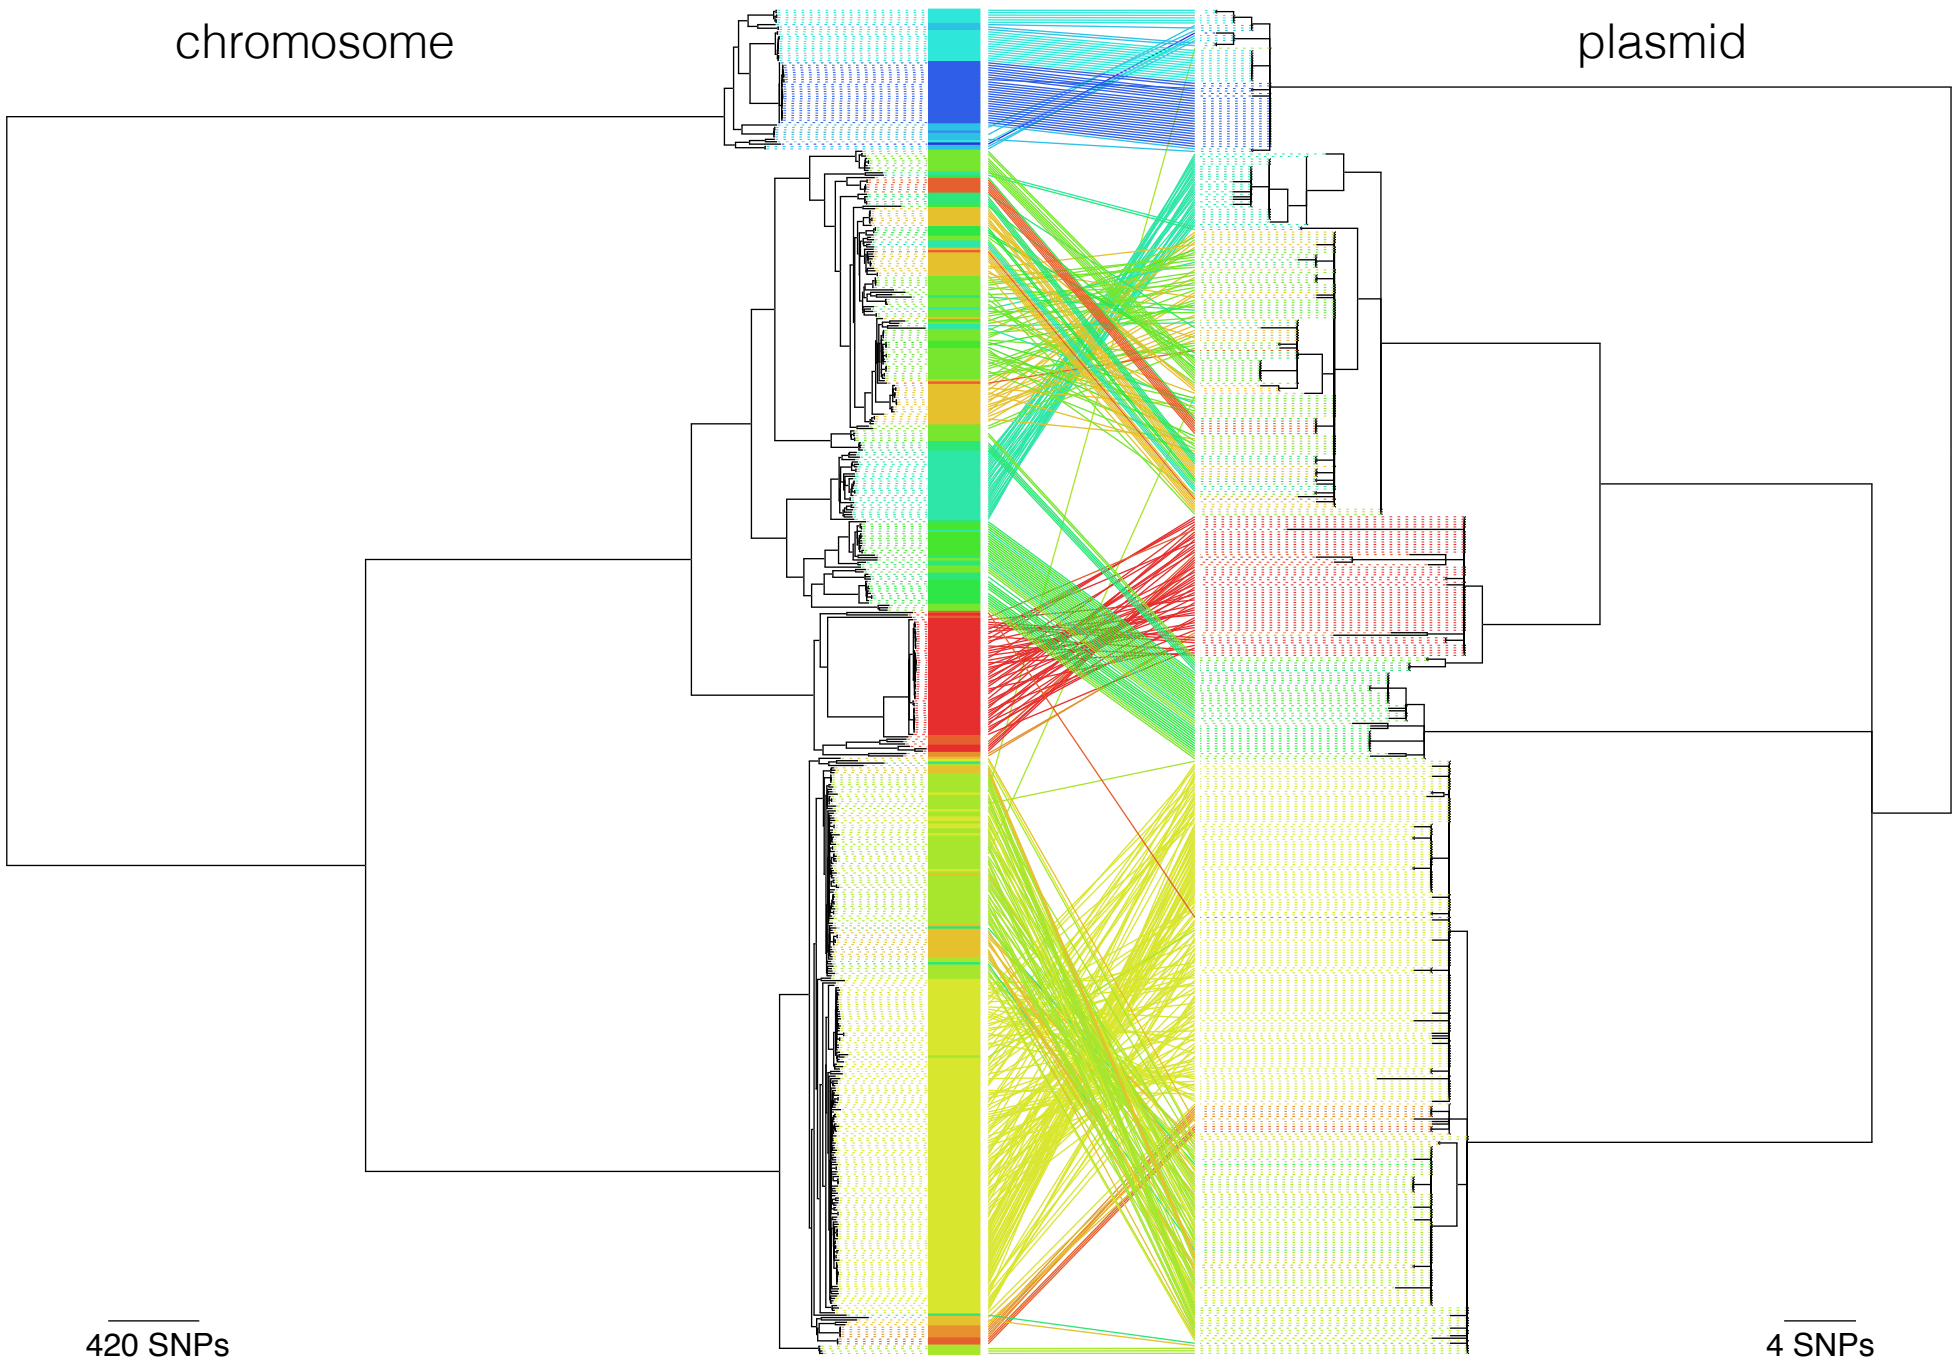

Supplement: supp_gr.212647.116_Supplemental_Fig_S1.pdf [file supp_gr.212647.116_Supplemental_Fig_S1.pdf]
