# Supplementary material for: Comprehensive global genome dynamics of Chlamydia trachomatis show ancient diversification followed by contemporary mixing and recent lineage expansion
Source: PubMed Central journal article supplement (PMC5495073; doi:10.1101/gr.212647.116), 2017-07
Supplement: supp_gr.212647.116_Supplemental_Fig_S2.pdf [file supp_gr.212647.116_Supplemental_Fig_S2.pdf]

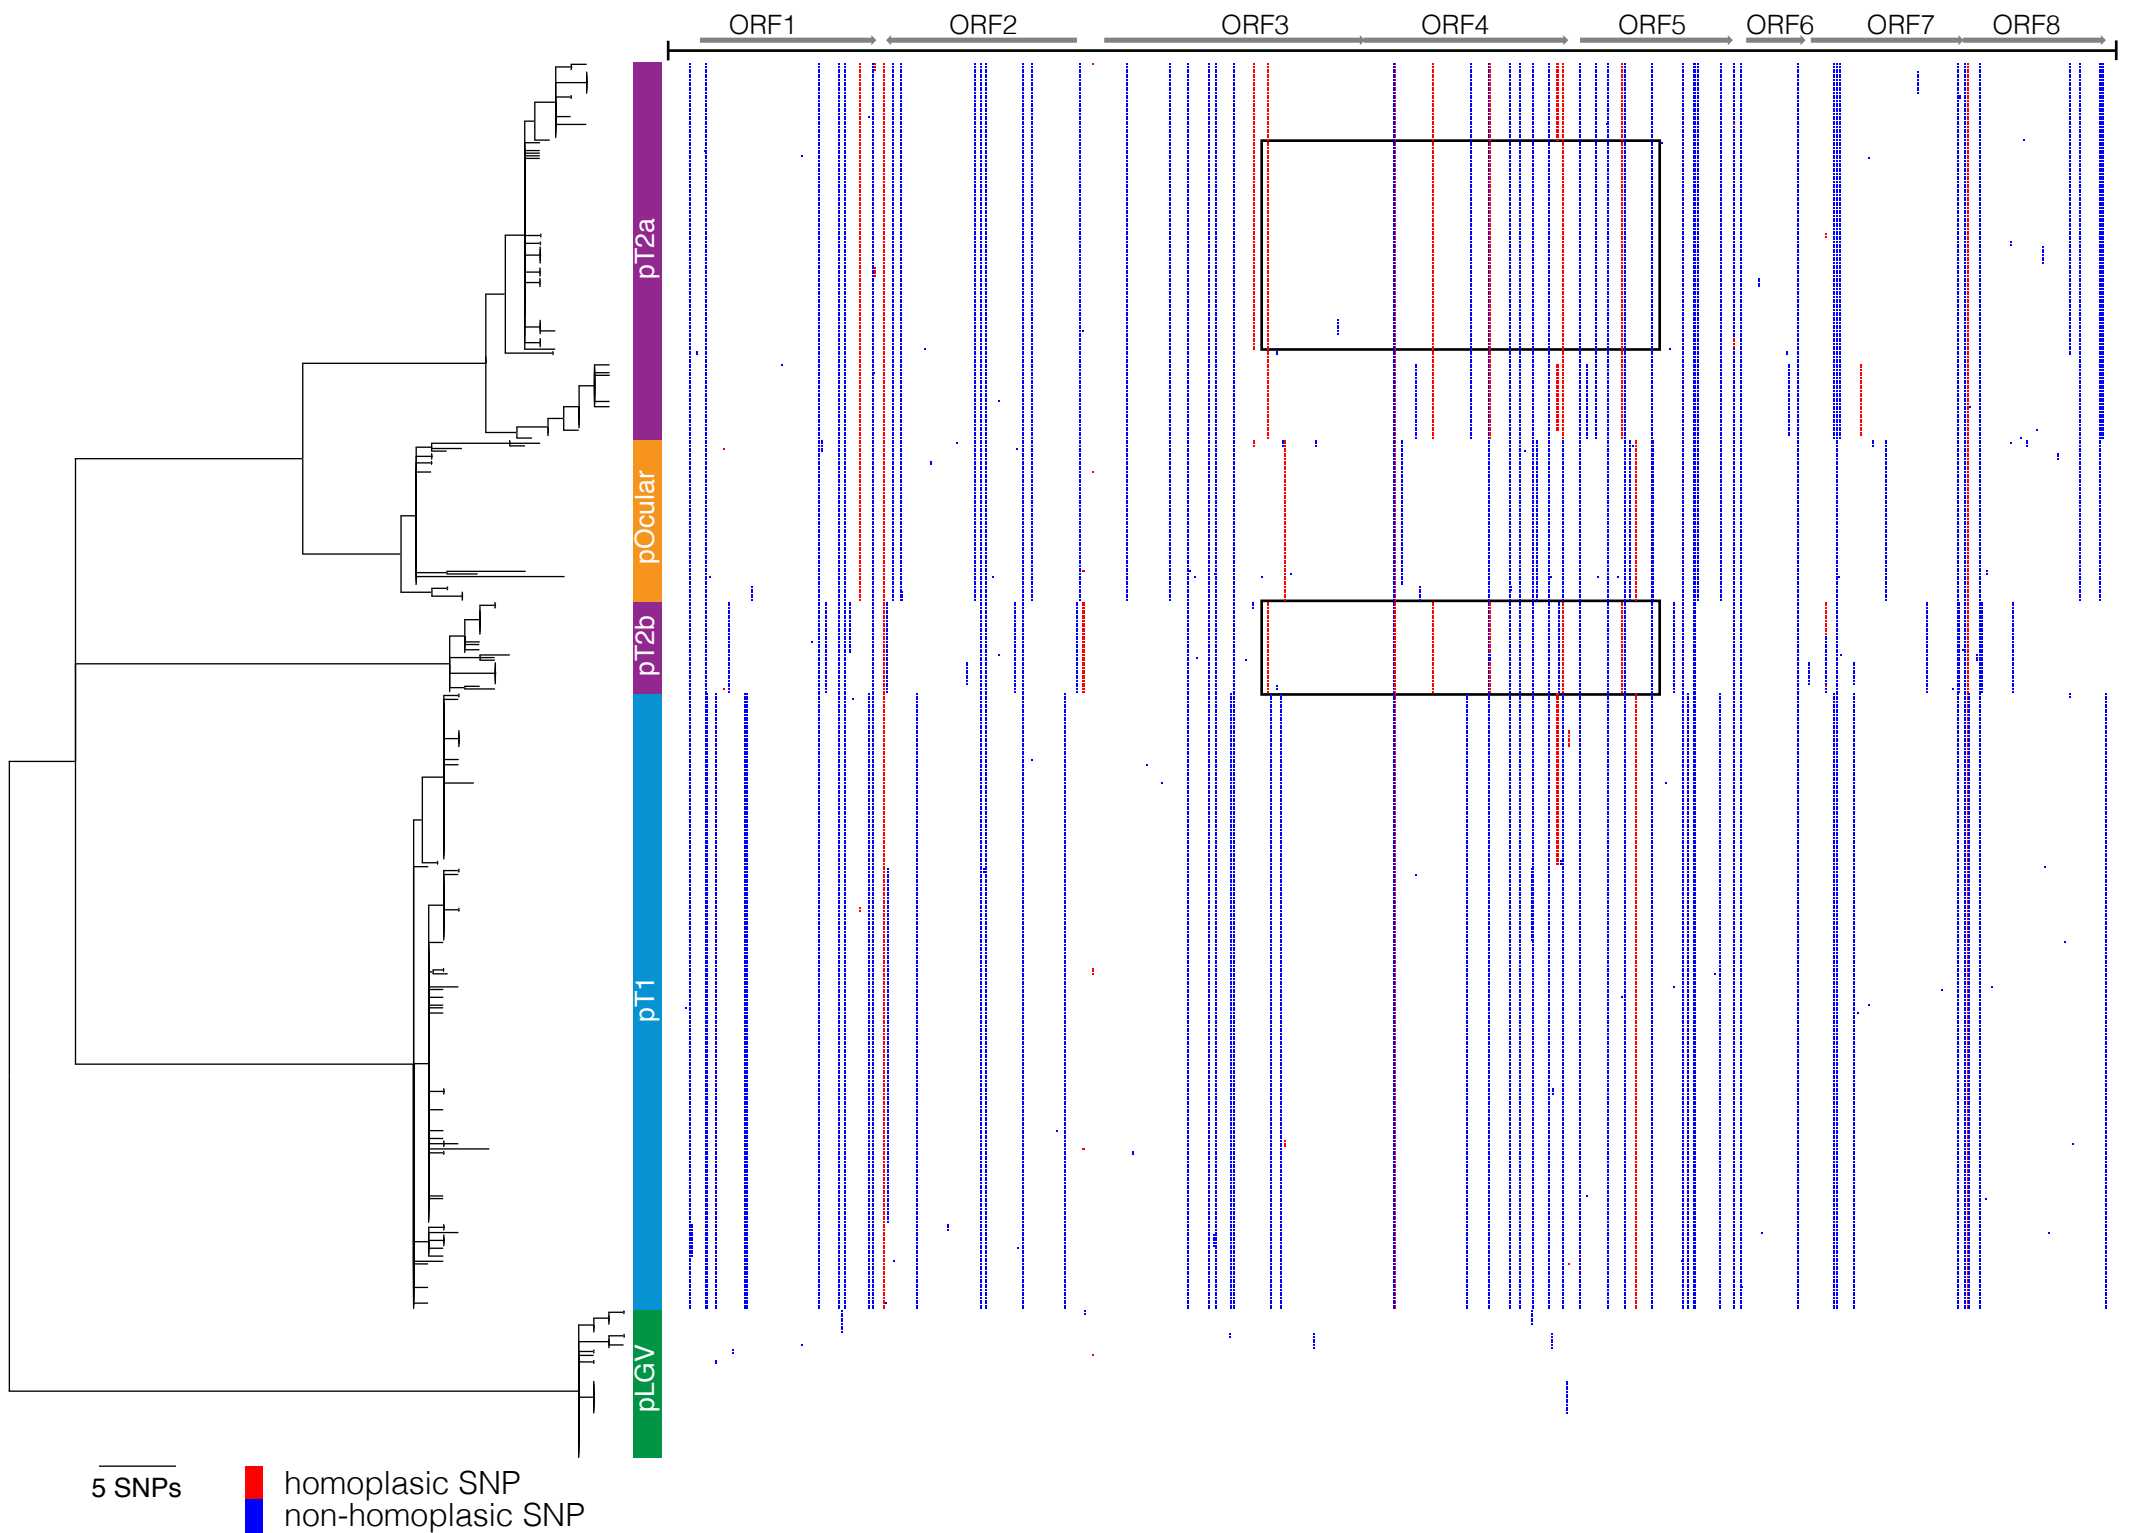

**Supplemental Fig S2** Plasmid phylogeny with single nucleotide polymorphisms (SNPs) (red: homoplasic SNPs) corresponding to an annotated and linearized plasmid. Identified block corresponds to a recombination or shared ancestry event between two clades (pT2a, pT2b) which are contained in T2 isolates.
