# Supplementary material for: Comprehensive global genome dynamics of Chlamydia trachomatis show ancient diversification followed by contemporary mixing and recent lineage expansion
Source: PubMed Central journal article supplement (PMC5495073; doi:10.1101/gr.212647.116), 2017-07
Supplement: supp_gr.212647.116_Supplemental_Fig_S3.pdf [file supp_gr.212647.116_Supplemental_Fig_S3.pdf]

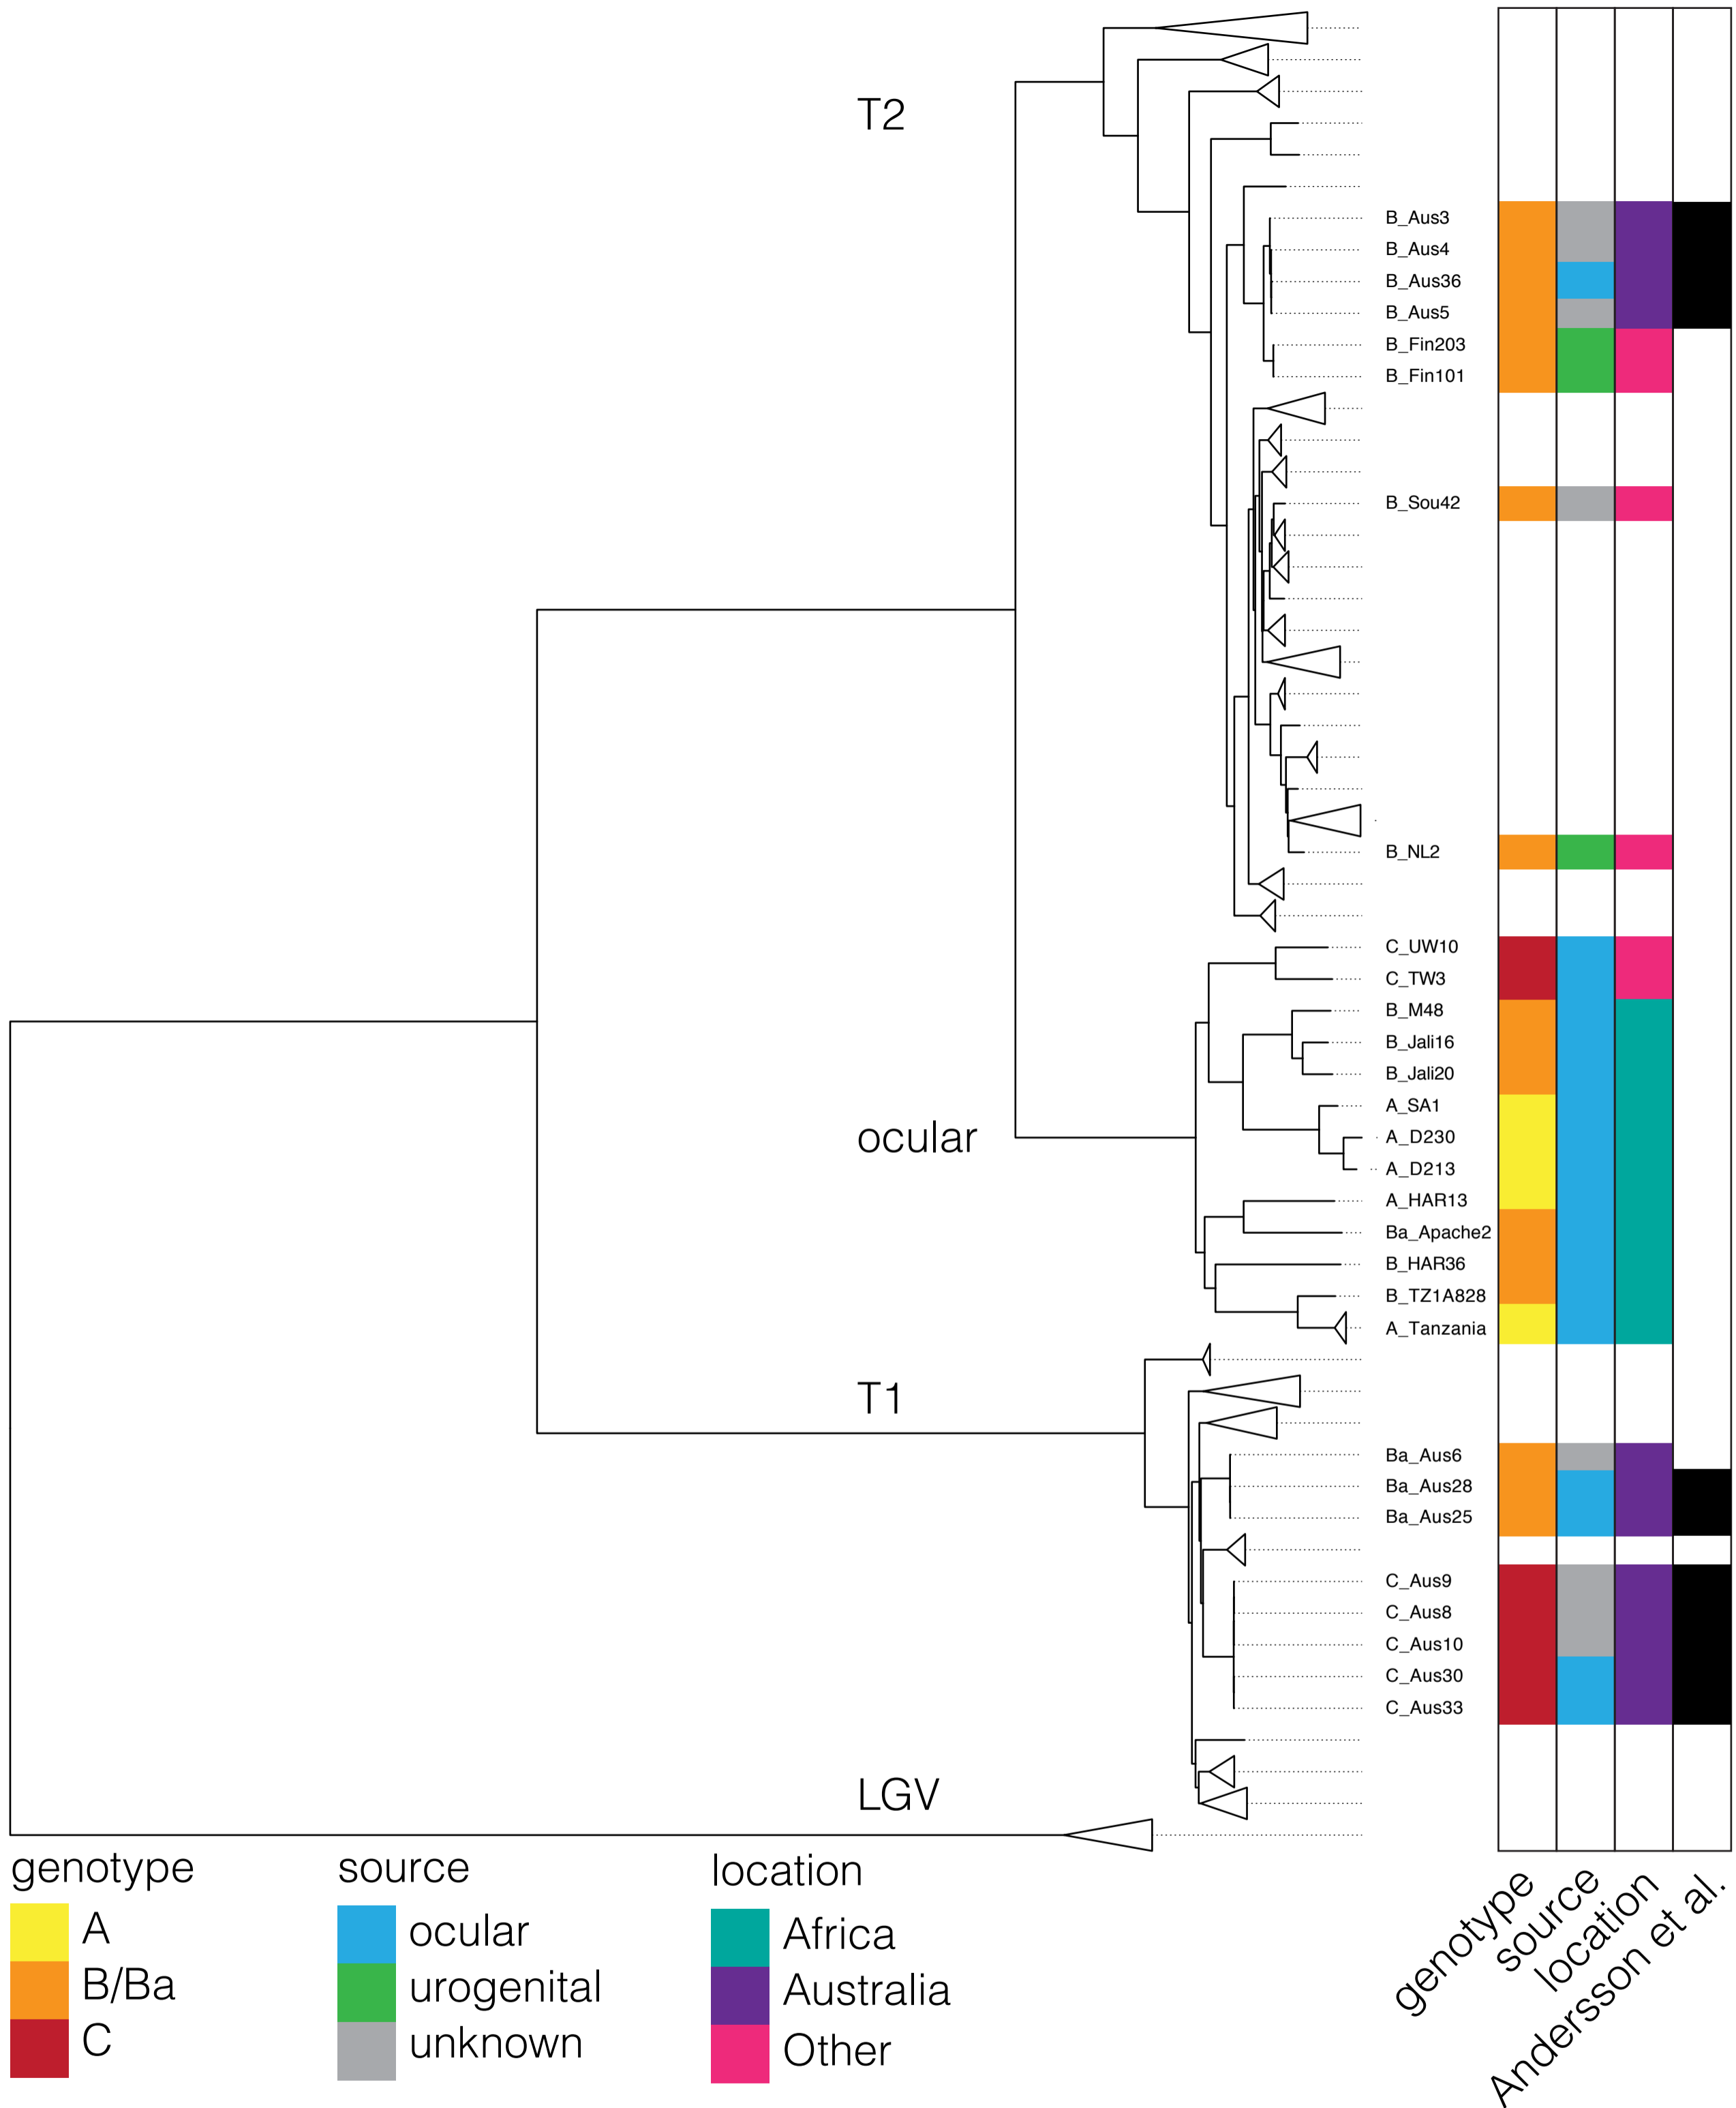

**Supplemental Fig S3** Collapsed species phylogeny highlighting the segregation of the B/Ba and C genotypes. There have been multiple introductions of ocular genotypes into both “urogenital” lineages and these introductions have been found in both ocular and urogenital infections.
