# Supplementary material for: Comprehensive global genome dynamics of Chlamydia trachomatis show ancient diversification followed by contemporary mixing and recent lineage expansion
Source: PubMed Central journal article supplement (PMC5495073; doi:10.1101/gr.212647.116), 2017-07
Supplement: supp_gr.212647.116_Supplemental_Fig_S4.pdf [file supp_gr.212647.116_Supplemental_Fig_S4.pdf]

genotype: A B-Ba C D E F G H I-la J K L1 L2 L2c L2b L3

chromosome

chromosome with recombination events removed

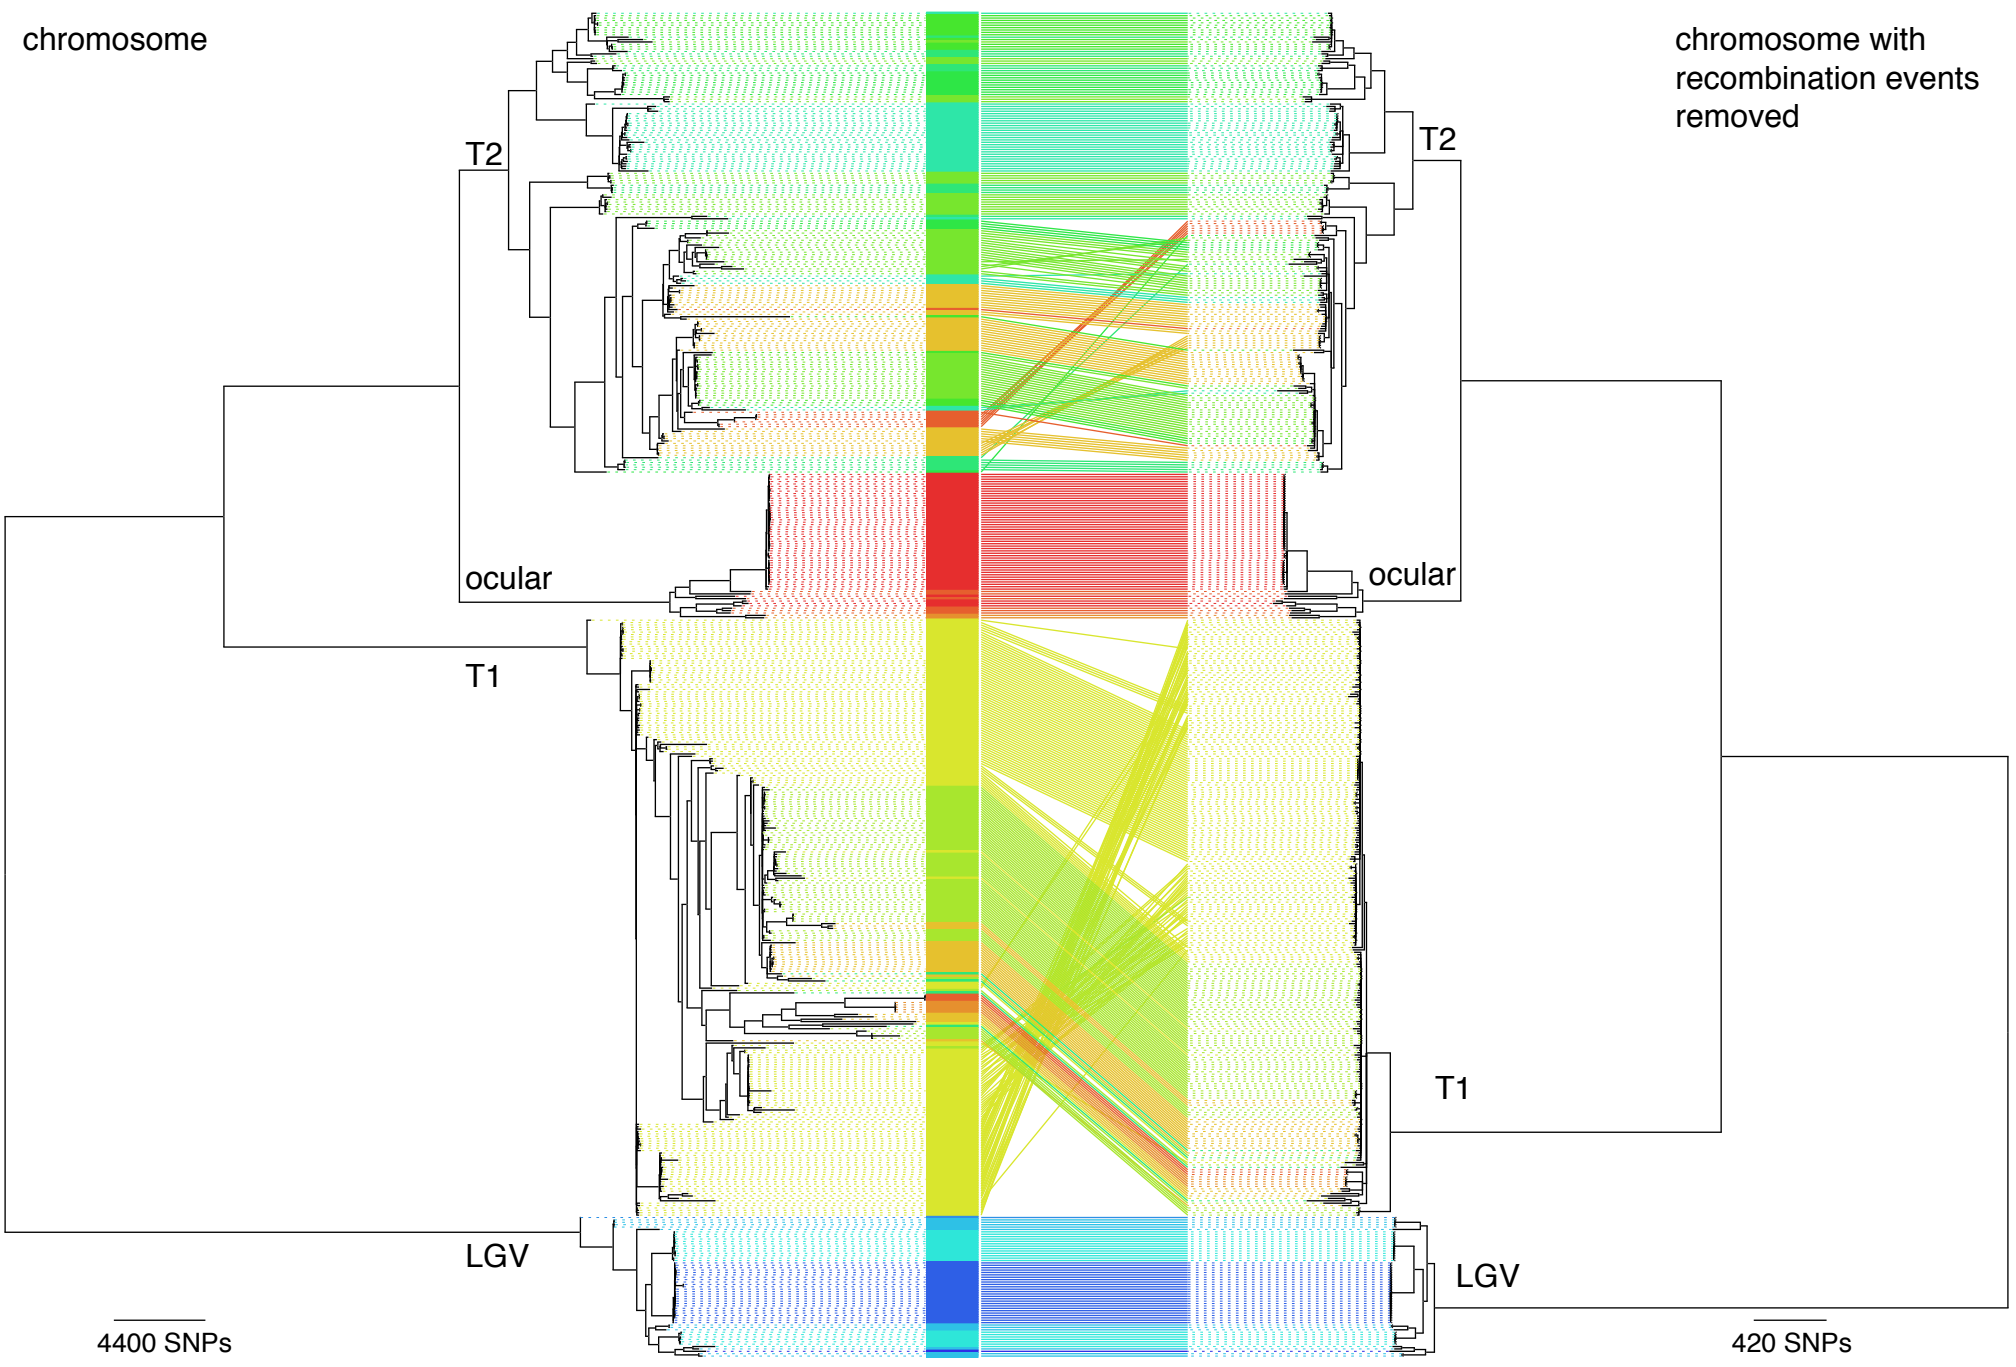

4400 SNPs

420 SNPs

**Supplemental Fig S4** Tanglegram of maximum-likelihood trees between chromosome (left) and chromosome with recombinations removed (right). Scale bars show single nucleotide polymorphism (SNP) differences and are specific to each tree.
