# Supplementary material for: Comprehensive global genome dynamics of Chlamydia trachomatis show ancient diversification followed by contemporary mixing and recent lineage expansion
Source: PubMed Central journal article supplement (PMC5495073; doi:10.1101/gr.212647.116), 2017-07
Supplement: supp_gr.212647.116_Supplemental_Fig_S6.pdf [file supp_gr.212647.116_Supplemental_Fig_S6.pdf]

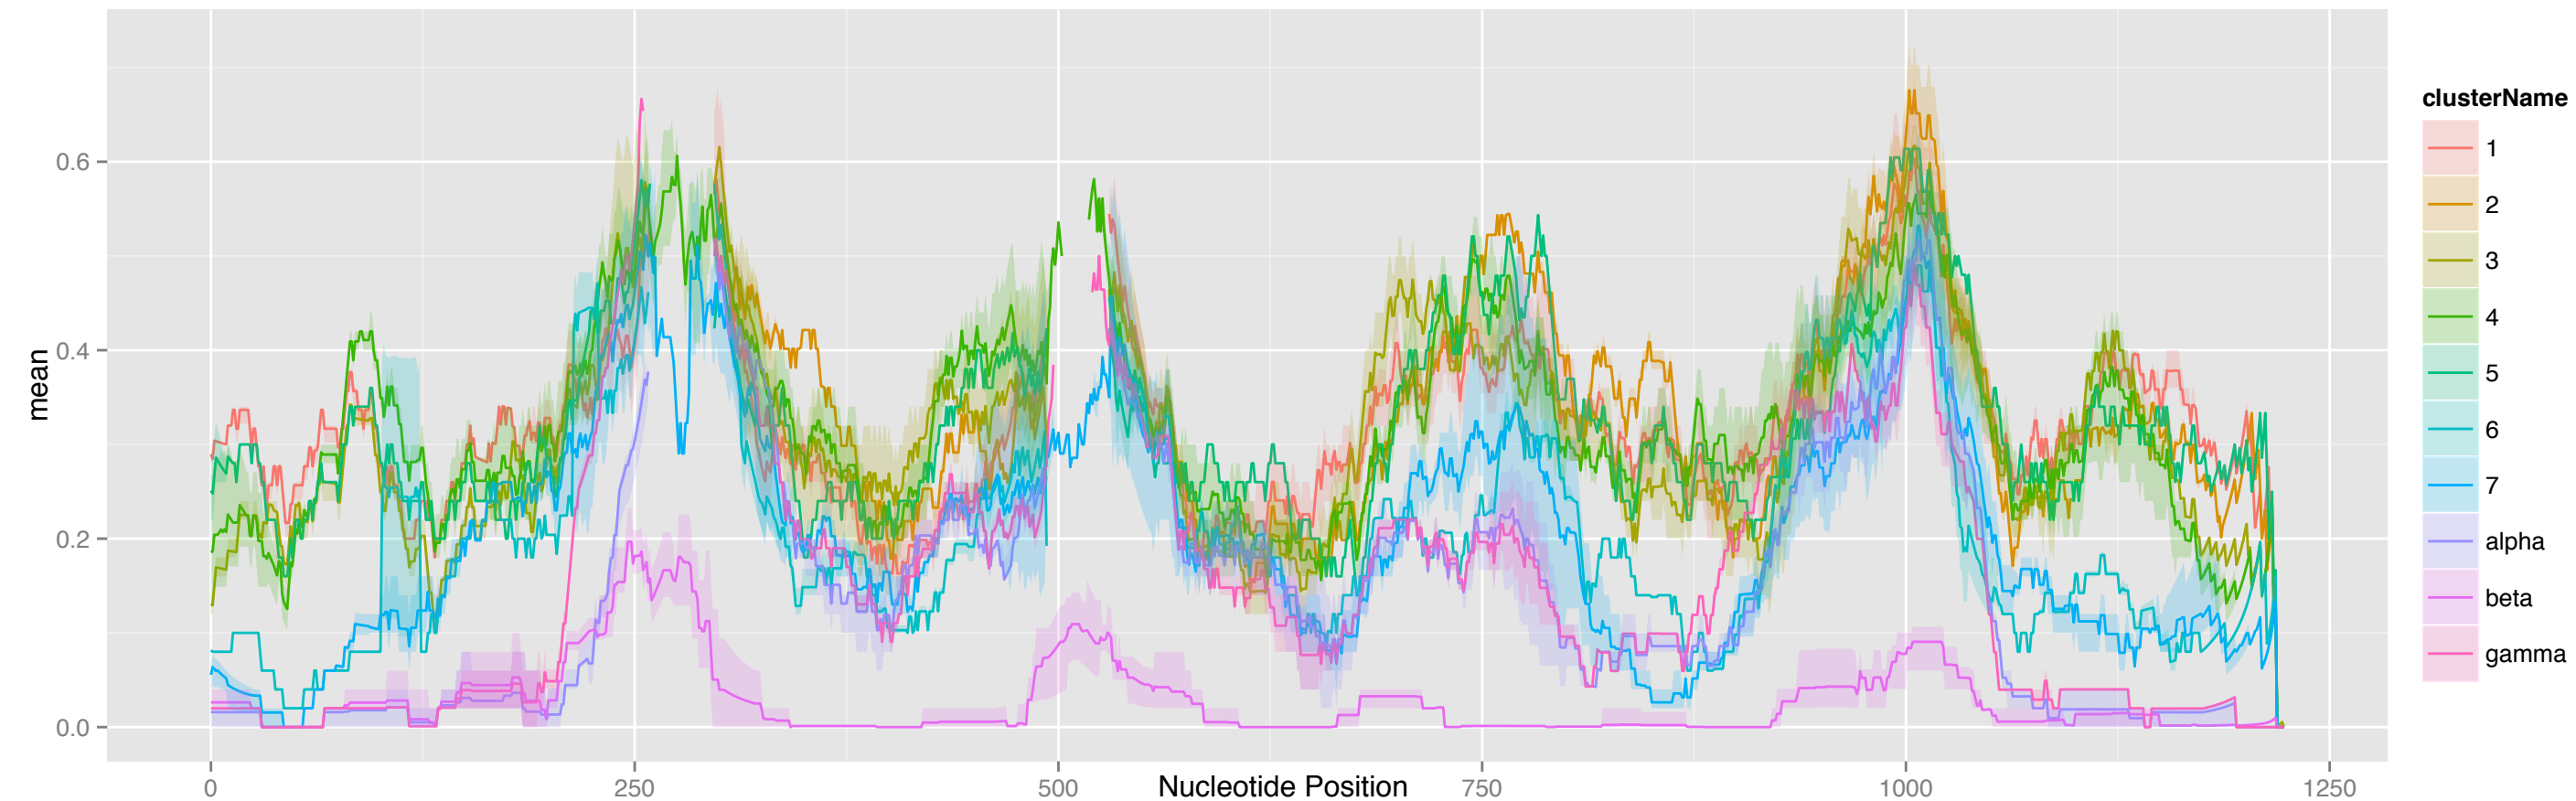

**Supplemental Fig S6** Pairwise comparison of major outer membrane protein (MOMP) clades found in Figure 5C with L1\_404 (the most ancestral *Chlamydia trachomatis* isolate obtained in 1967). Shading shows 10th and 90th percentile.
